# Supplementary material for: Sociotechnical Factors Affecting Patients’ Adoption of Mobile Health Tools: Systematic Literature Review and Narrative Synthesis
Source: PubMed Central journal article supplement (PMC9121221; doi:10.2196/36284), 2022-05-05
Supplement: mhealth_v10i5e36284_app5.pdf [file mhealth_v10i5e36284_app5.pdf]

## Appendix 5.A. Social and Personal factors and their occurrence.

| Factors (n)                         | References                                                                                                                                                                |
|-------------------------------------|---------------------------------------------------------------------------------------------------------------------------------------------------------------------------|
| <b>Moderating Factors</b>           |                                                                                                                                                                           |
| Age (71)                            | Older age a barrier [34–67,70,86,88–91,93,97,98,118,121,122,124,125,132,150]; facilitator [68–71]; mixed results [77–85,95,104,105]; not a factor [72–76]                 |
| Gender (34)                         | Being female a barrier [43,65,92,93]; facilitator [39,51,54,55,67,71,82,83,85–88]; mixed results [35,49,69,77,94,95,125]; not a factor [36,40,45,50,53,62,68,73,89–91]    |
| Education (34)                      | Lower level of education a barrier [35,42–44,46,49,55,57,64,65,72,84,89–93,96–98,125]; facilitator [45,88,99]; mixed results [39,41,51,56,78,82,83,95]; not a factor [68] |
| Tech skills (30)                    | Lack of tech skills a barrier [43,52,61,62,69,72,74,77,79,80,88,100–105,108,113,114,127,131,132,172]; mixed results [58,64,66,106,107]; not a factor                      |
| Tech experience (27)                | Having a previous tech experience as a facilitator [38,40,46,48,49,54,56,78,83–85,92,96,97,102,108–118]; mixed results [127]                                              |
| Ethnicity (24)                      | Being non-white a barrier [35,62,64,66,71,84,119–122]; facilitator [43,44,51,77,124,125]; mixed results [56,69,95,123]; not a factor [50,53,86,90]                        |
| Socioeconomic factors / Income (22) | Lower income a barrier [37,43,44,51,57,63,77,82–84,89–91,126,127]; mixed results [39,41,62,95]; not a factor [48,50,52]                                                   |
| Geographic residence (9)            | Rural residence a barrier [50,71,83,89]; facilitator [113]; mixed results [76,95]; not a factor [90,91]                                                                   |
| Marital status / living alone (7)   | Being single or living alone a barrier [43,82,83,95,119]; facilitator [50]; not a factor [53]                                                                             |
| <b>Personal Characteristics</b>     |                                                                                                                                                                           |
| Attitudes / preferences (29)        | [36,37,41,43,45,55,56,58,60,62,69,77,83,87,101–103,114,115,119,127–135]                                                                                                   |
| Psychological factors (17)          | [67,69,73,79,80,85,101,107,112,115,118,136–140,178]                                                                                                                       |
| Time constraint / distraction (16)  | [55,69,80,91,100,110,112,115,116,118,120,132,137,138,140,141]                                                                                                             |
| Motivation (12)                     | [100,101,107,114,130,140,142–147]                                                                                                                                         |

|                                     |                                      |                                                                                        |
|-------------------------------------|--------------------------------------|----------------------------------------------------------------------------------------|
|                                     | Locus of control / self-efficacy (7) | [80,110,140,143,167,178,180]                                                           |
|                                     | Awareness (6)                        | [58,60,78,102,127,135]                                                                 |
|                                     | Habits (5)                           | [57,70,110,140,142]                                                                    |
| <b>Cultural and Social Elements</b> |                                      |                                                                                        |
|                                     | Social influence (30)                | [36,57,67,70,78,81,95,102,104,107,108,110,113,115,118,128,129,131,132,140,142,149-157] |
|                                     | Language (8)                         | [44,61,78,106,110,158-160]                                                             |
|                                     | Culture (4)                          | [95,118,121,155]                                                                       |

## Appendix 5.B. Technical and material factors and their occurrence.

| Factors (n)                                        | References                                                                                                                                                                                                                 |
|----------------------------------------------------|----------------------------------------------------------------------------------------------------------------------------------------------------------------------------------------------------------------------------|
| <b>Usefulness</b>                                  |                                                                                                                                                                                                                            |
| Perceived benefits and performance expectancy (55) | [36,40,43,46,56,60,62,69,70,74,76,78,79,81,83,87,92,94,97,100-102,106,107,110,114,117,127,129,132-134,137,140-142,146-150,154-157,161-167,171,172,176]                                                                     |
| Convenience and accessibility (40)                 | [34,38,43,54,59,61,65,70,74,75,77,79,92,96,99,103,105,107,111,113,115,116,119,120,127,128,130,131,135,137,141,144,151,152,154,157,168-171]                                                                                 |
| Communication (36)                                 | [52,60,61,69,70,75,77,79,80,92,98,99,101,104,107,111,113,115,116,118,128,130,131,136,137,141,146,152,154,160,165,169,170,172-174]                                                                                          |
| Health education (33)                              | [38,40,42,53,58,77,79,80,88,101,102,104,105,107,113,116,118,130,136,140,141,144-147,149,152,154,155,157,171,175,176]                                                                                                       |
| Self-management (31)                               | [43,60,61,70,75,79,80,98,101,102,104,109,113,117,118,120,131,136,139-141,144,145,149,152,157,161,163,164,171,175]                                                                                                          |
| Quality of care (12)                               | [42,61,79,113,118,135,163,169-171,173,175]                                                                                                                                                                                 |
| Health benefits (12)                               | [42,49,55,58,98,107,114,117,138,140,141,149]                                                                                                                                                                               |
| Monitoring (11)                                    | [77,79,80,97,104,107,120,145,155,171,175]                                                                                                                                                                                  |
| Early detection of symptoms (6)                    | [40,80,87,101,107,144]                                                                                                                                                                                                     |
| Personalized feedback (5)                          | [95,101,147,171,177]                                                                                                                                                                                                       |
| Life quality and well-being (4)                    | [70,103,129,135]                                                                                                                                                                                                           |
| <b>Ease of Use (54)</b>                            | [36,38,49,55-60,70,72,76-78,81,91,94,95,97,101,102,104,107,110,112,114,116,117,120,129-132,134-139,142,146,148-150,157,160-163,165,167,171,176,179]                                                                        |
| <b>Technical Factors</b>                           |                                                                                                                                                                                                                            |
| Technical issues (43)                              | Technical failure or difficulties [37,52,58,68-70,77,80,100,114,118-120,130-132,135,137,138,141,145,148,151,155,175,178]; infrastructure [65,77,78,102,112,116,118,120,132,148,152,155,158,166]; login issues [78,152,171] |
| Access to technology (20)                          | [34,37,43,52,66,69,85,92,95,100,103,107,108,115,127,128,132,135,157,166]                                                                                                                                                   |
| Training (13)                                      | [61,70,79,80,100,108,116,117,131,157,162,172,175]                                                                                                                                                                          |
| Tech support (5)                                   | [55,70,102,117,131]                                                                                                                                                                                                        |
| <b>Monetary Factors (35)</b>                       | Monetary and cost aspects a barrier<br>[52,55,58,61,78,91,97,101,104,106,107,118,130,131,152,166,1                                                                                                                         |

|                        |                                            |                                                                                                                                                                                                                                                                      |
|------------------------|--------------------------------------------|----------------------------------------------------------------------------------------------------------------------------------------------------------------------------------------------------------------------------------------------------------------------|
|                        |                                            | 70]; facilitator [43,80,105,111,113,116,151,168,173]; mixed results [42,65,92,93,126,169]; not a factor [81,129,142]                                                                                                                                                 |
| <b>Data related</b>    |                                            |                                                                                                                                                                                                                                                                      |
|                        | Privacy and security (51)                  | Privacy and security a barrier<br>[38,40,43,52,55,58,61,77,85,87,91,97,101,104,107,108,116-118,128-130,133,137,139,141,146,147,151,152,155,157,160,165,169,170,176]; facilitator [57,96,168,174]; mixed results [78,92,93,144,154,164,173]; not a factor [59,94,120] |
|                        | Quality, reliability, and credibility (20) | [40,57-59,78,93,94,101,107,109,110,113,116,118,127,130,144,154,176,179]                                                                                                                                                                                              |
|                        | Relevance (6)                              | [117,118,137,146,154,162]                                                                                                                                                                                                                                            |
| <b>User Experience</b> |                                            |                                                                                                                                                                                                                                                                      |
|                        | Usability (19)                             | [40,60,78,101,107,110,129,130,135-137,139,146,147,152,154,162,174,178]                                                                                                                                                                                               |
|                        | Personalization (17)                       | [78,98,101,104,107,118,130,133,138,146,147,154,157,160,162,164,165]                                                                                                                                                                                                  |

**Appendix 5.C.** Health related factors and their occurrence.

| Factors (n)                                   | References                                                                |
|-----------------------------------------------|---------------------------------------------------------------------------|
| <b>Disease or Health Condition</b>            |                                                                           |
| Worse condition as a barrier (21)             | [52,57,64–66,68,73,76,80,104,107,112,114,115,117,119,121,148,159,161,171] |
| Worse condition as a facilitator (11)         | [39,41,49,55,79,83,89,98,132,138,177]                                     |
| Disease type as a factor (7)                  | [50,74,83,86,90,91,120]                                                   |
| Risk perception (5)                           | [36,92,110,123,129]                                                       |
| Not a factor (3)                              | [35,48,100]                                                               |
| <b>Care team's role</b>                       |                                                                           |
| Facilitator (14)                              | [59,60,70,78,81,85,93,97,132,134,136,143,164,180]                         |
| Barrier (8)                                   | [44,62,80,101,107,118,154,169]                                            |
| Mixed results (4)                             | [72,125,142,175]                                                          |
| <b>Health consciousness and literacy (17)</b> | [40,49,51,65,72,73,81,86,93,98,107,110,121,134,142,156,159]               |
| <b>Relation to other therapies (15)</b>       | [52,54,57,80,85,96,98,100,102,112–114,141,162,179]                        |
| <b>Health behavior (7)</b>                    | [41,48,49,67,75,98,106]                                                   |
| <b>Insurance status (5)</b>                   | [37,71,82,90,126]                                                         |
